# Supplementary material
Source: PubMed Central journal article supplement (PMC5710417)
Supplement: jamasurg-152-1015-s001.pdf [file jamasurg-152-1015-s001.pdf]

## Supplementary Online Content

Dhillon NK, Ko A, Smith EJT, et al. Potentially avoidable surgical intensive care unit admissions and disposition delays. *JAMA Surg*. Published online July 19, 2017.  
doi:10.1001/jamasurg.2017.2165

**eTable.** Criteria for Admission for Patients With Traumatic Brain Injury

This supplementary material has been provided by the authors to give readers additional information about their work.

**eTable. Criteria for Admission for Patients With Traumatic Brain Injury**

|                                                                                                                                                                                                        |
|--------------------------------------------------------------------------------------------------------------------------------------------------------------------------------------------------------|
| <b>Patient admitted to SICU if one of the following was present:</b>                                                                                                                                   |
| Abnormal neurologic exam (focal neurologic exam, abnormal, pupillary exam, GCS $\leq$ 12)                                                                                                              |
| Takes Coumadin, Aspirin, or Plavix, or has an underlying coagulopathy                                                                                                                                  |
| Displaced skull fracture                                                                                                                                                                               |
| Subdural hematoma $\geq$ 8 mm                                                                                                                                                                          |
| Epidural hematoma $\geq$ 8 mm                                                                                                                                                                          |
| Intraparenchymal hematoma $\geq$ 8 mm, multiple locations (3 or more)                                                                                                                                  |
| Scattered subarachnoid hemorrhage                                                                                                                                                                      |
| Intraventricular hemorrhage                                                                                                                                                                            |
| Attending physician discretion                                                                                                                                                                         |
| <b>Patient admitted to a monitored floor bed if all of the following were present:</b>                                                                                                                 |
| Normal neurologic exam                                                                                                                                                                                 |
| Does not take Coumadin, Aspirin, or Plavix and has no underlying coagulopathy                                                                                                                          |
| Does not have a skull fracture or has a non-displaced skull fracture                                                                                                                                   |
| Any one of the following:<br>Subdural hematoma 5-7 mm<br>Epidural hematoma 5-7 mm<br>Intraparenchymal hematoma 5-7 mm<br>Intraparenchymal hematoma in 2 locations<br>Localized subarachnoid hemorrhage |
| No intraventricular hemorrhage                                                                                                                                                                         |
| Attending physician discretion                                                                                                                                                                         |
| <b>Patient admitted to a floor bed for observation if all of the following are present:</b>                                                                                                            |
| Normal neurologic exam                                                                                                                                                                                 |
| Not intoxicated                                                                                                                                                                                        |
| Does not take Coumadin, Aspirin, or Plavix and has no underlying coagulopathy                                                                                                                          |
| Does not have a skull fracture                                                                                                                                                                         |
| No subdural hematoma or subdural hematoma $\leq$ 4 mm                                                                                                                                                  |
| Epidural hematoma or epidural hematoma $\leq$ 4 mm                                                                                                                                                     |
| No intraparenchymal hemorrhage or intraparenchymal hemorrhage $\leq$ 4 mm or in 1 location                                                                                                             |
| No subarachnoid hemorrhage or trace subarachnoid hemorrhage                                                                                                                                            |
| No intraventricular hemorrhage                                                                                                                                                                         |
| Attending physician discretion                                                                                                                                                                         |

*Adapted from the Brain Injury Guidelines*
